# Supplementary material
Source: publisher figshare collection journal article supplement (https://acs.figshare.com/ndownloader/files/3760492)
Supplement: Supplementary file 1 [file 3760492]

**A**

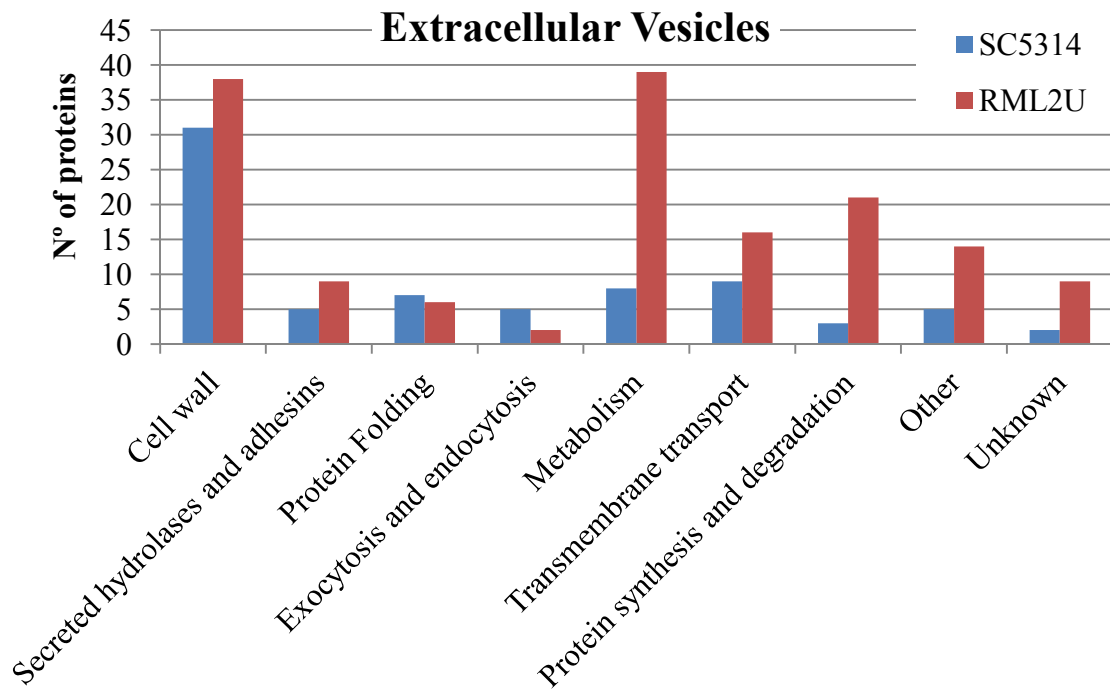

**B**

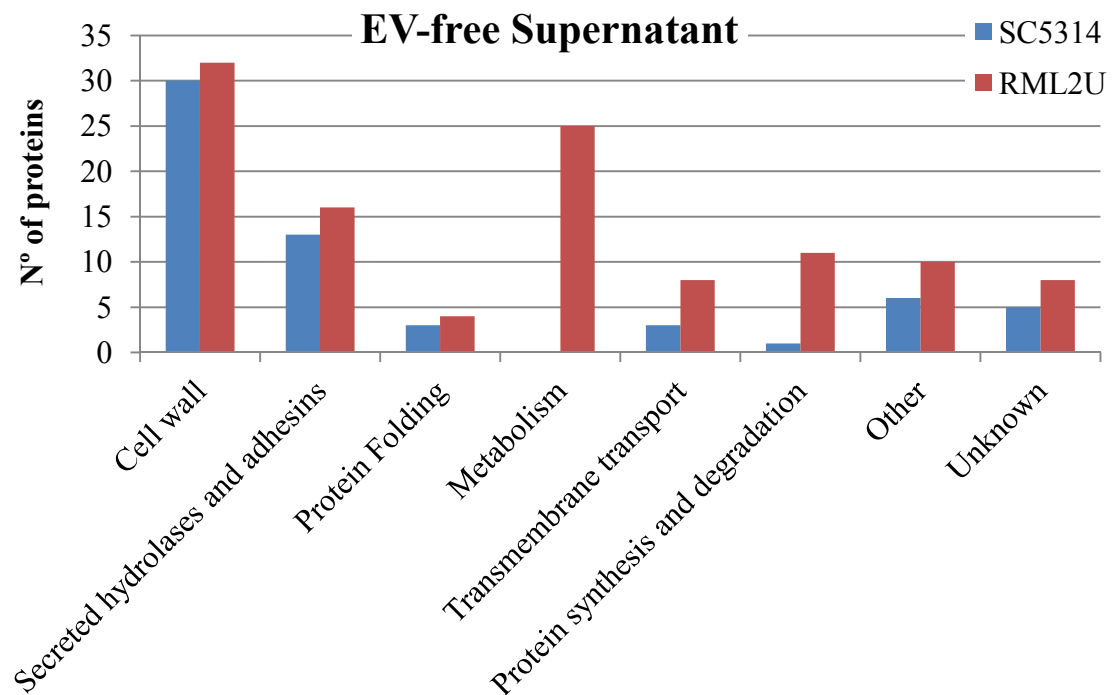

**Figure S2.** Comparative analysis of the different biological processes in which proteins from SC5314 and RML2U that are (A) carried by extracellular vesicles or (B) secreted by the classical pathway (EV-free supernatant) are involved.
